# Supplementary material
Source: publisher figshare collection journal article supplement (https://sage.figshare.com/ndownloader/files/22078026)

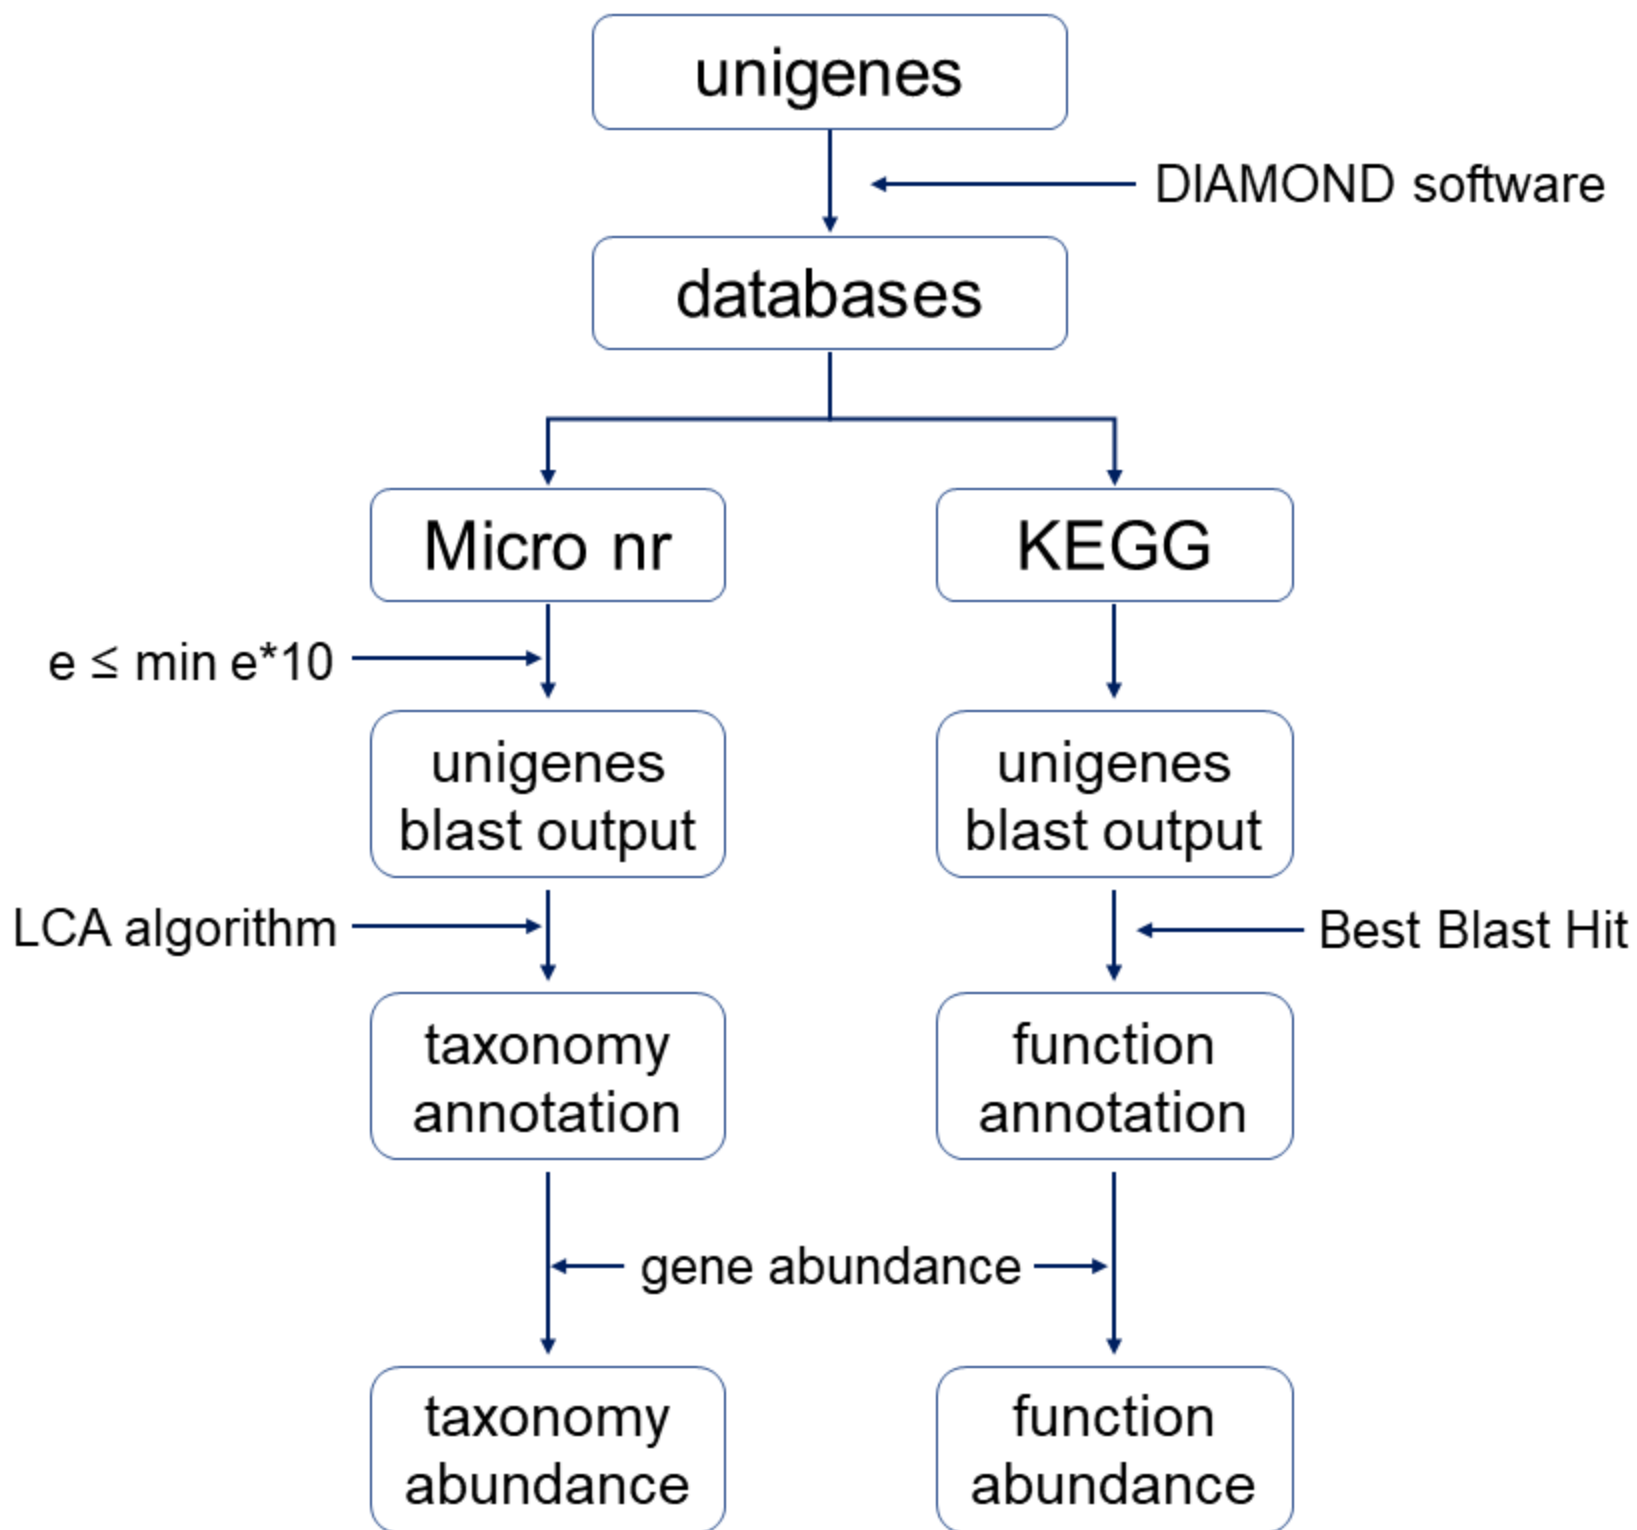

Appendix Figure 2. The pipeline of taxonomic and functional annotation.

Supplement: Supplementary file 1 [file 22078026]
